# Supplementary material for: Hydrotalcite Intercalated siRNA: Computational Characterization of the Interlayer Environment
Source: MDPI journal article supplement (doi:10.3390/pharmaceutics4020296), 2012-06-07
Supplement: s1 [file s1]

## Hydrotalcite Intercalated siRNA: Computational Characterization of the Interlayer Environment

Hong Zhang, Defang Ouyang, Vinuthaa Murthy, Yunyi Wong, Zhiping Xu and Sean C. Smith

**Figure S1.** Optimized structures for the model of A-RNA (a) and A'-RNA (b) using Smart Minimizer in Discover and COMPASS forcefield.

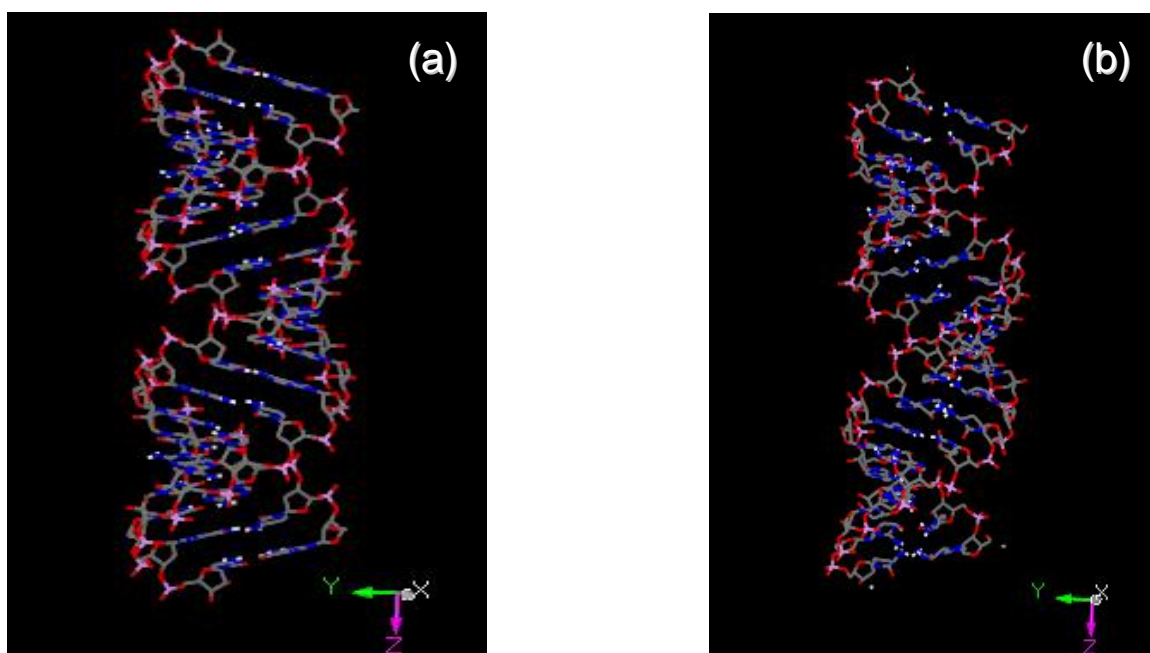

**Figure S2.** The minimized structures for the partially relaxed LDH hybrid systems of A-RNA (a) and A'-RNA (b). Only siRNA (coloured in yellow for clarity) and water molecules in the central layer are allowed to relax during the initial minimization.

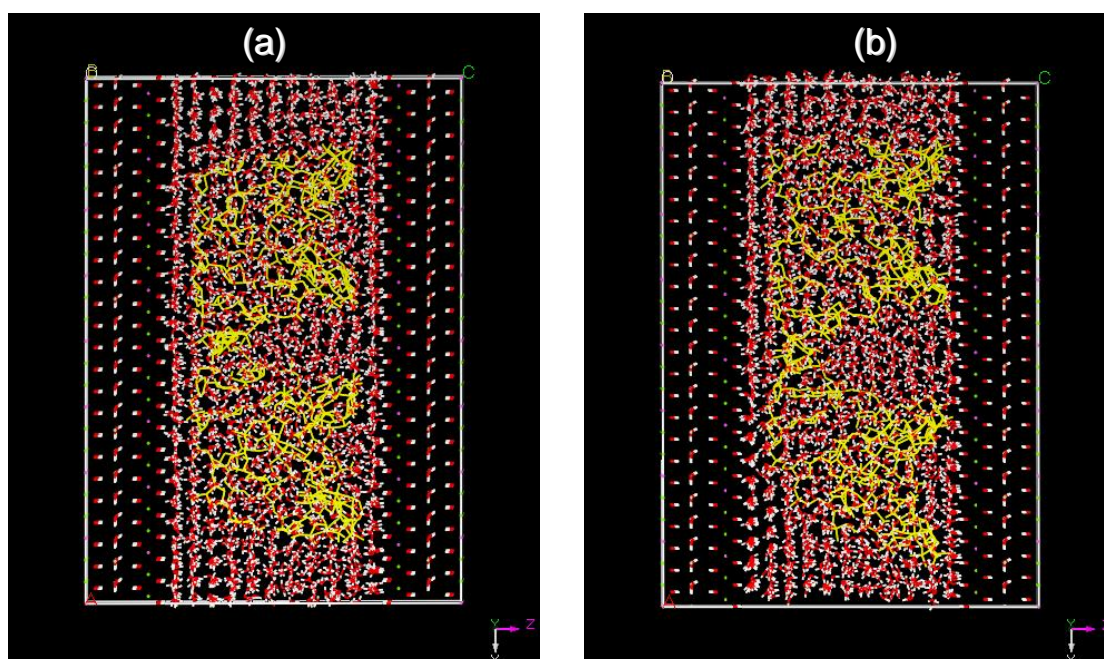

**Figure S3.** The optimized structures for the fully relaxed hybrid systems of A-RNA (a) and A'-RNA (b). siRNA is colored in yellow for clarity.

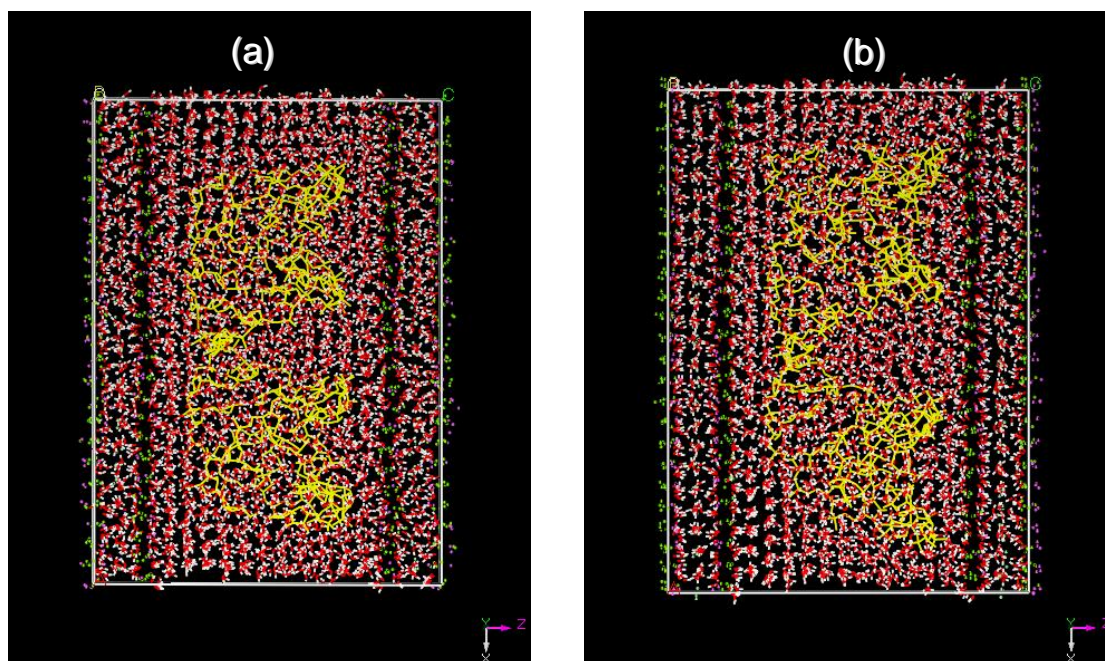

**Figure S4.** Snapshots at 500 ps for the hybrid LDH + A'-RNA systems from partially constrained simulations in (a) and from unconstrained simulation in (b).

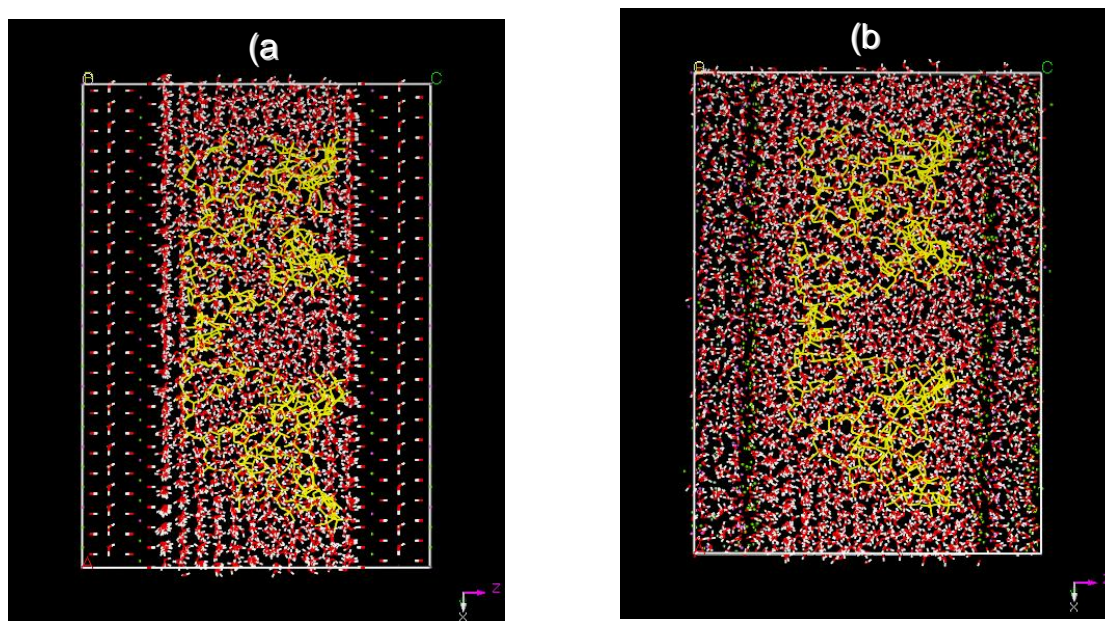



**Figure S5.** Plots of close contacts for siRNA in the LDH-RNA hybrid systems for A-RNA in (a) and for A'-RNA in (b).

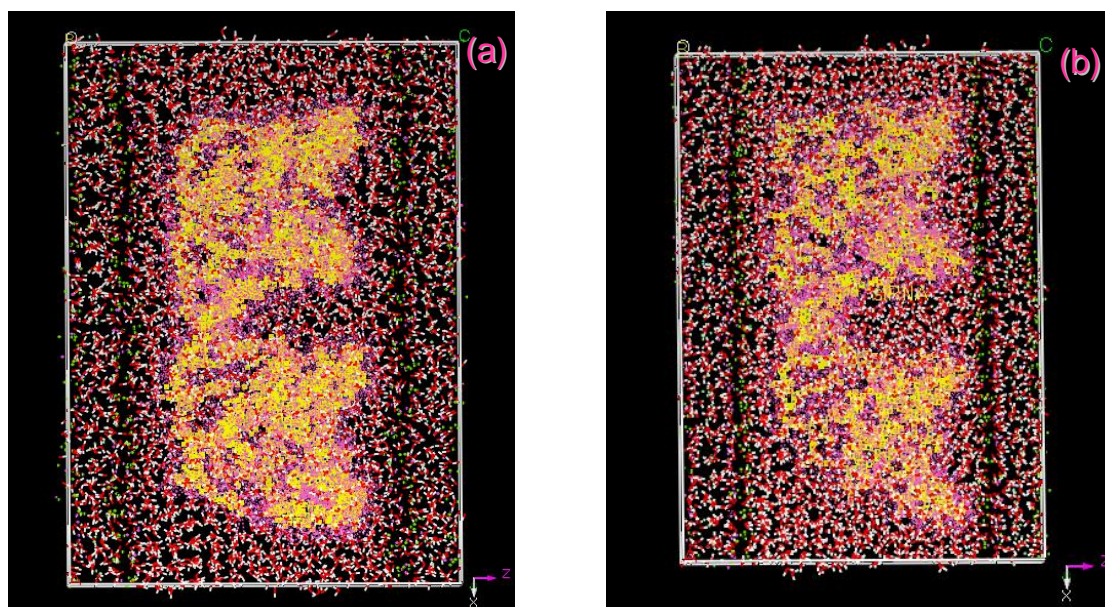

**Figure S6.** Plots of hydrogen bonding for siRNA in the LDH-RNA hybrid systems for A-RNA in (a) and for A'-RNA in (b).

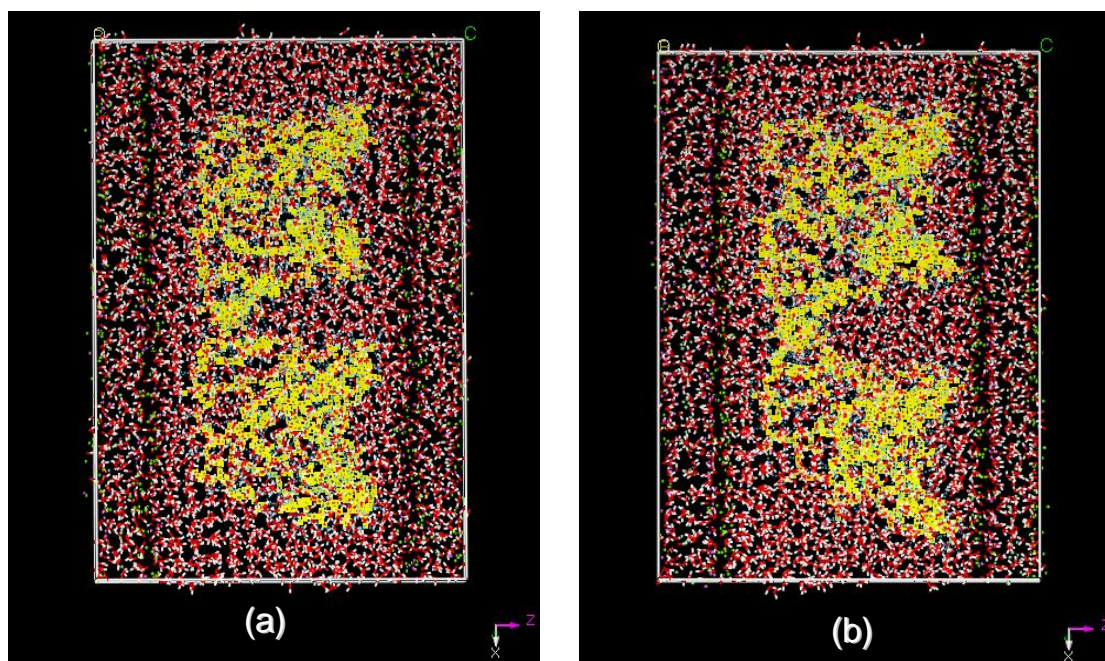

**Figure S7.** siRNA in water by COMPASS force field in Material Studio 4.4.

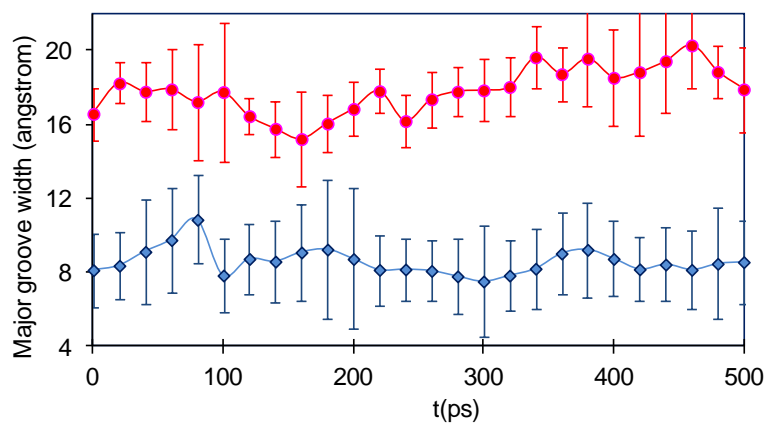

**Figure S8.** Calculated MSD for water in LDH + A-RNA (a) and LDH + A'-RNA (b) from 500 ps of fully relaxed MD simulations at 300 K.

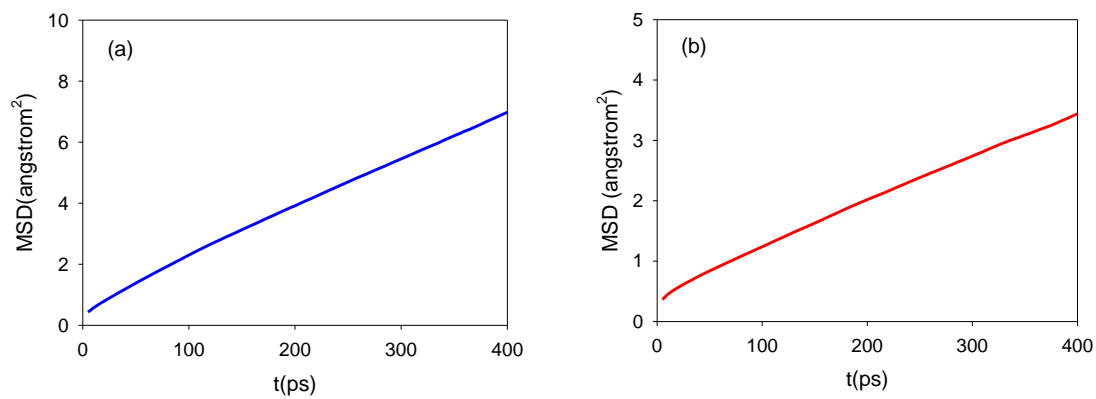

**Figure S9.** Comparison of PXRD patterns for LDH +DNA/RNA systems from both simulation and experiment. The simulation results (a–b) are from minimized structures of LDH + A'-RNA systems, *i.e.*, (a) for partially relaxed LDH + A'-RNA and (b) for fully relaxed LDH + A'-RNA. The experimental results (c–d) are for  $Mg_2Al/NO_3^-$  LDHs intercalated with plasmid DNA[5] in (c) and for  $Mg_2Al/NO_3^-$  LDHs intercalated with linear DNA[6] in (d)

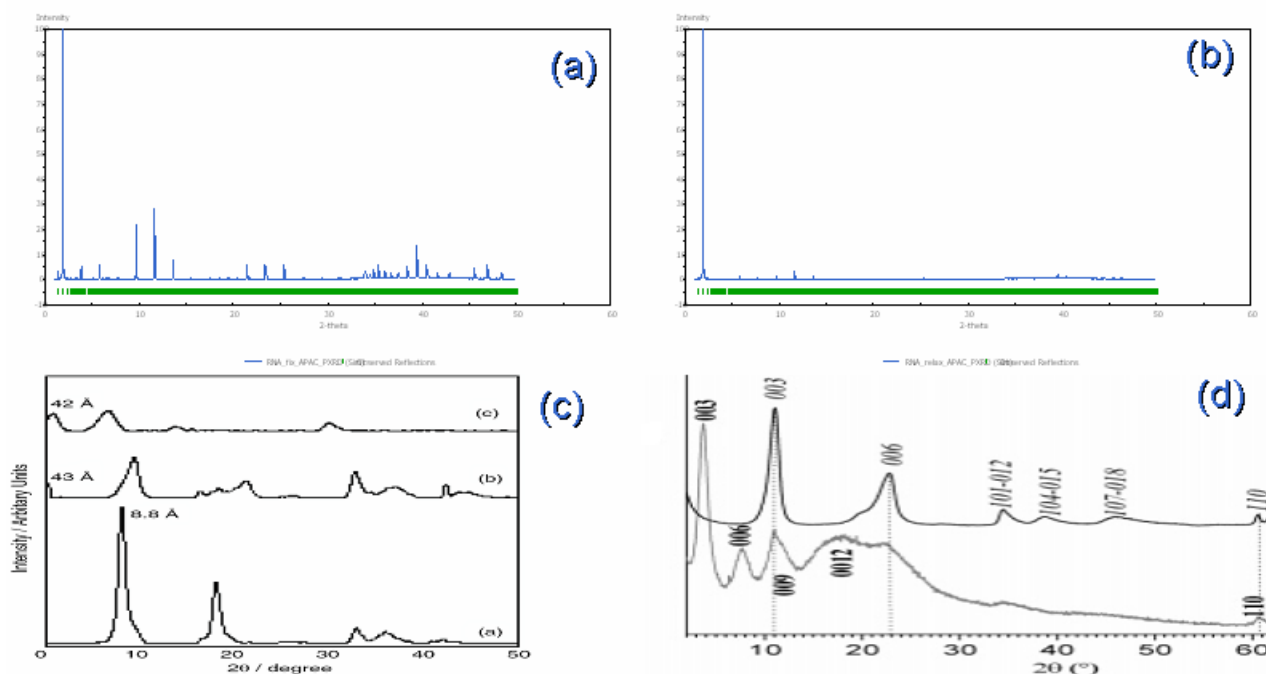

## Tables

**Table S1.** The summary of self diffusion coefficients at 300 K for different LDH intercalates. Unit is in  $cm^2/s$ , and \* represents this work.

| <i>System</i>                                      | <i>D-water</i>        | <i>D-siRNA</i>        |
|----------------------------------------------------|-----------------------|-----------------------|
| A-RNA in water                                     | $4.62 \times 10^{-5}$ | $1.28 \times 10^{-6}$ |
| A'-RNA in water                                    | $4.28 \times 10^{-5}$ | $1.61 \times 10^{-6}$ |
| LDH + A-RNA *                                      | $9.68 \times 10^{-7}$ | $7.24 \times 10^{-8}$ |
| LDH + A'-RNA *                                     | $4.33 \times 10^{-7}$ | $4.24 \times 10^{-8}$ |
| LDH + terephthalate (64 water molecules) [7,27,28] | $4.4 \times 10^{-7}$  |                       |
| LDH + terephthalate (44 water molecules) [7,27,28] | $1.1 \times 10^{-7}$  |                       |
| Simulations of bulk water [29]                     | $1.88 \times 10^{-5}$ |                       |
| Experimental value for bulk water [30]             | $2.3 \times 10^{-5}$  |                       |

**Table S2.** Comparison of basal spacing from simulation and experiment for LDH + DNA/RNA hybrid systems. Unit is in angstrom, and \* represents this work.

| <i>System</i>                           | <i>d-simulation</i> | <i>d-experiment</i> |
|-----------------------------------------|---------------------|---------------------|
| LDH + A-RNA (partially relaxed model)*  | 30.3                |                     |
| LDH + A-RNA (fully relaxed model)*      | 32.0                |                     |
| LDH + A'-RNA (partially relaxed model)* | 30.3                |                     |
| LDH + A'-RNA (fully relaxed model)*     | 29.9                |                     |
| LDH/DDNAS [5]                           |                     | 21.1                |
| LDH/DDNAS [1]                           |                     | 23.9                |
| LDH/circular DNA [6]                    |                     | 42.0                |
